# Supplementary material
Source: Springer Nature journal article supplement (https://www.springermedizin.de/resource/supplementary/13058_2013_3553_MOESM22_ESM.pdf/9703942)

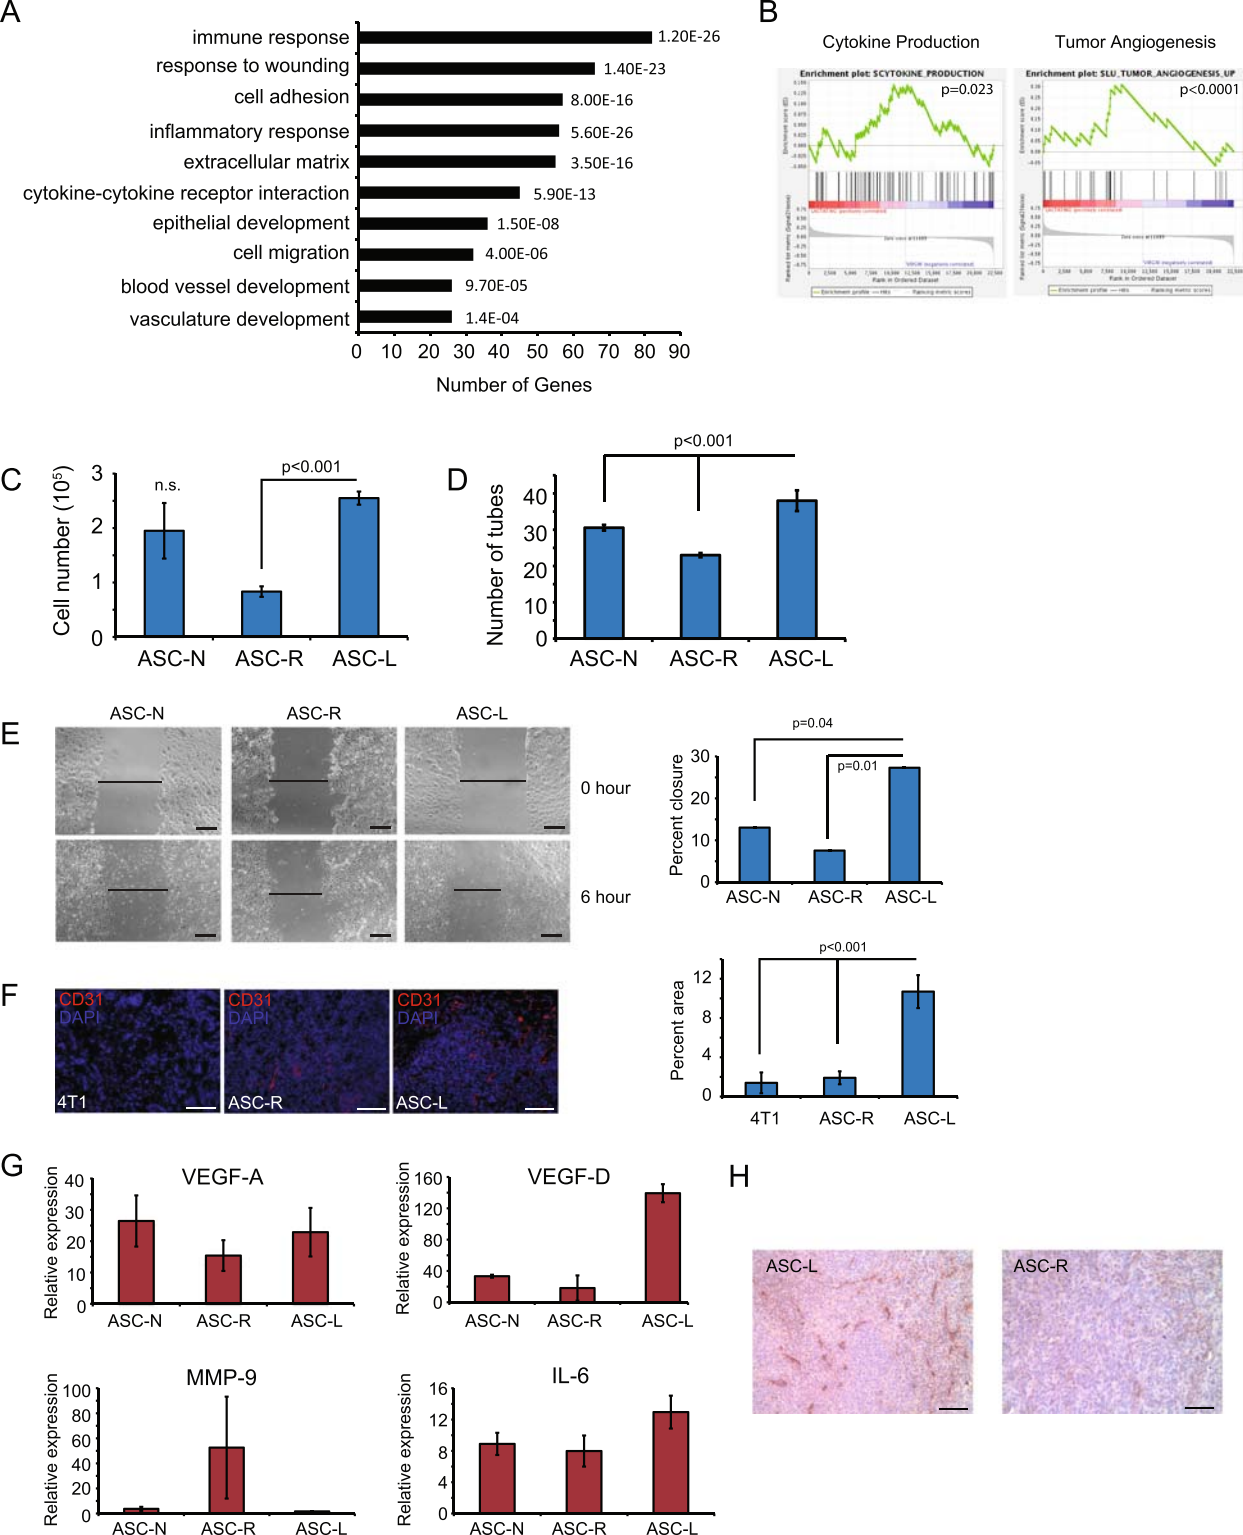

Supplement: MOESM22 [file 9703942]
